# Supplementary material for: Fish Collagen Peptides Enhance Thymopoietic Gene Expression, Cell Proliferation, Thymocyte Adherence, and Cytoprotection in Thymic Epithelial Cells via Activation of the Nuclear Factor-κB Pathway, Leading to Thymus Regeneration after Cyclophosphamide-Induced Injury
Source: MDPI journal article supplement (doi:10.3390/md21100531), 2023-10-12
Supplement: s1 [file s1]

| Gene name   | Forward (5'-3')          | Reverse (5'-3')          |
|-------------|--------------------------|--------------------------|
| BMP-4       | GCCGAGCCAACACTGTGAGGA    | GATGCTGCTGAGGTTGAAGAGG   |
| Cathepsin L | GGAAAATGGAGGTCTGGACTCG   | GTGTCATTAGCCACAGCGAACTC  |
| CCL21       | GGGTCAGGACTGCTGCCTTAAG   | AGCTCAGGCTTAGAGTGCTTCC   |
| CCL25       | AAGGCTAGTCCACTGGAAGAGC   | GTGGCACTCCTCACGCTTGTAC   |
| CD40        | ACCAGCAAGGATTGCGAGGCAT   | GGATGACAGACGGTATCAGTGG   |
| CD80        | CCTCAAGTTTCCATGTCCAAGGC  | GAGGAGAGTTGTAACGGCAAGG   |
| CD86        | ACGTATTGGAAGGAGATTACAGCT | TCTGTCAGCGTTACTATCCCGC   |
| CK5         | GAACAGAGGCTGAGTCCTGGTA   | TCTCAGCCTCTGGATCATTCCG   |
| CK8         | TGGAAGGACTGACCGACGAGAT   | GGCACGAACTTCAGCGATGATG   |
| CXCL5       | CCGCTGGCATTCTGTGCTGT     | CAGGGATCACCTCCAAATTAGCG  |
| Dll1        | GCTGGAAGTAGATGAGTGTGCTC  | CACAGACCTTGCCATAGAAGCC   |
| Dll4        | GGGTCCAGTTATGCCTGCGAAT   | TTCGGCTTGGACCTCTGTTCAG   |
| FGF-7       | TGTTCTGTGCGACCCAGTGGTA   | TTCCAAGTGGCACGGTCCTGAT   |
| FoxN1       | CGGAAGCCTTCCAGTCAGTGAA   | TGTTGAGGGACAGGTTATGGCG   |
| ICAM-1      | AAACCAGACCCTGGAAGTGCAC   | GCCTGGCATTTCAGAGTCTGCT   |
| IGF-1       | GTGGATGCTCTTCAGTTCGTGTG  | TCCAGTCTCCTCAGATCACAGC   |
| IL-21       | GCCTCCTGATTAGACTTCGTAC   | CAGGCAAAAGCTGCATGCTCAC   |
| IL22R       | TTTCCTCGTCGGCTTGCTCTGT   | CGTGTTCTTGGAATGAAGCGTAGG |
| IL-7        | CAGGAACTGATAGTAATTGCCCG  | CTTCAACTTGCGAGCAGCACGA   |
| Leptin      | GCAGTGCCTATCCAGAAAGTCC   | GGAATGAAGTCCAAGCCAGTGAC  |
| LTβ         | CCTGTTGTTGGCAGTGCCTATC   | GACGGTTTGCTGTCATCCAGTC   |
| LTβR        | TCCTTGGAGGAAGTGGTGCTAC   | CGGTCACATGAATGCCATTTCGC  |
| RANK        | GGACAACGGAATCAGATGTGGTC  | CCACAGAGATGAAGAGGAGCAG   |
| RANKL       | GTGAAGACACACTACCTGACTCC  | GCCACATCCAACCATGAGCCTT   |
| SDF-1       | GACTGGCATAGTCGGCAATGGA   | CAAAGAGGAGGTCAGCCACTGA   |
| VCAM-1      | AAACCAGACCCTGGAAGTGCAC   | GCCTGGCATTTCAGAGTCTGCT   |
| VEGF-A      | CTGCTGTAACGATGAAGCCCTG   | GCTGTAGGAAGCTCATCTCTCC   |
| Wnt4        | GAGAACTGGAGAAGTGTGGCTG   | CTGTGAGAAGGCTACGCCATAG   |
| GAPDH       | CATCACTGCCACCCAGAAGACTG  | ATGCCAGTGAGCTTCCCGTTCAG  |
